# Supplementary material for: A formal MIM specification and tools for the common exchange of MIM diagrams: an XML-Based format, an API, and a validation method
Source: Springer Nature journal article supplement (doi:10.1186/1471-2105-12-167), 2011-05-17
Supplement: 12859_2011_4555_MOESM2_ESM.pdf [file 12859_2011_4555_MOESM2_ESM.pdf]

## Entity Glyphs

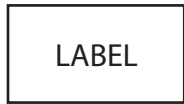

Conceptual entity

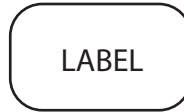

Simple physical entity

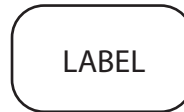

Entity feature

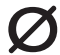

Source/Sink

LABEL:POSITION

Modifier

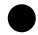

Restricted copy

## Reaction Glyphs

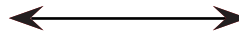

Non-covalent reversible binding

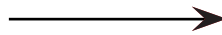

Covalent modification

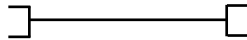

Covalent irreversible binding

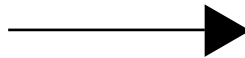

Stoichiometric conversion

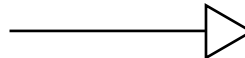

Production without loss

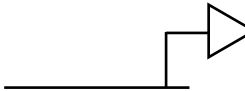

Template reaction

## Catalytic Interaction Glyphs

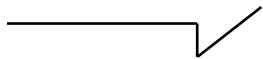

Covalent bond cleavage

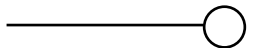

Catalysis

## Contingency Glyphs

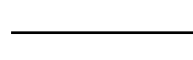

Stimulation

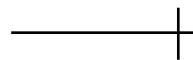

Necessary stimulation

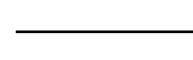

Inhibition

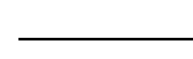

Absolute Inhibition
