# Supplementary material for: A formal MIM specification and tools for the common exchange of MIM diagrams: an XML-Based format, an API, and a validation method
Source: Springer Nature journal article supplement (doi:10.1186/1471-2105-12-167), 2011-05-17

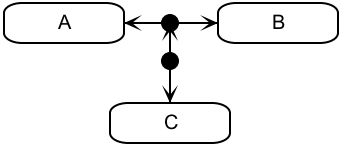

Supplement: 12859_2011_4555_MOESM4_ESM.pdf [file 12859_2011_4555_MOESM4_ESM.pdf]
