# Supplementary material for: A formal MIM specification and tools for the common exchange of MIM diagrams: an XML-Based format, an API, and a validation method
Source: Springer Nature journal article supplement (doi:10.1186/1471-2105-12-167), 2011-05-17
Supplement: 12859_2011_4555_MOESM7_ESM.pdf [file 12859_2011_4555_MOESM7_ESM.pdf]

```
<?xml version="1.0" encoding="UTF-8"?>
<mimVis:Diagram width="158.4" height="146.3" xmlns:mimVis="http://imp.nci.nih.gov/mim/mimVisLevel1">
  <mimVis:EntityGlyph visId="a6fc4" centerX="47.0" centerY="123.0" width="60.0" height="20.0"
    color="000000" type="SimplePhysicalEntity" displayName="CaMK">
  </mimVis:EntityGlyph>
  <mimVis:EntityGlyph visId="e839e" centerX="47.0" centerY="38.0" width="20.0" height="20.0"
    color="000000" type="Modifier" displayName="P">
  </mimVis:EntityGlyph>
  <mimVis:EntityGlyph visId="a677d" centerX="114.0" centerY="74.0" width="60.0" height="20.0"
    color="000000" type="SimplePhysicalEntity" displayName="Phtase">
  </mimVis:EntityGlyph>
  <mimVis:InteractionGlyph visId="id4f7e9fd7" color="000000">
    <mimVis:Point x="47.0" y="48.0" arrowHead="Line" visRef="e839e" relX="0.0" relY="1.0"/>
    <mimVis:Point x="47.0" y="113.0" arrowHead="CovalentModification" visRef="a6fc4" relX="0.0" relY="-1.0"/>
    <mimVis:anchorRef>bd4fd</mimVis:anchorRef>
    <mimVis:mimBioRef>b8e</mimVis:mimBioRef>
  </mimVis:InteractionGlyph>
  <mimVis:InteractionGlyph visId="id82185491" color="000000">
    <mimVis:Point x="47.0" y="74.0" arrowHead="CovalentBondCleavage" visRef="bd4fd" relX="0.0" relY="0.0"/>
    <mimVis:Point x="84.0" y="74.0" arrowHead="Line" visRef="a677d" relX="-1.0" relY="0.0"/>
  </mimVis:InteractionGlyph>
  <mimVis:Anchor visId="bd4fd" position="0.4" type="Invisible"/>
  <mimVis:MimBio>
    <mimVis:title>CaMK Phosphorylation</mimVis:title>
    <mimVis:identifier>20101117</mimVis:identifier>
    <mimVis:PublicationXRef visId="b8e">
      <mimVis:db>PubMed</mimVis:db>
      <mimVis:id>16267266</mimVis:id>
      <mimVis:title>Molecular interaction maps of bioregulatory networks:
        a general rubric for systems biology.</mimVis:title>
      <mimVis:author>Kohn KW</mimVis:author>
      <mimVis:author>Aladjem MI</mimVis:author>
      <mimVis:author>Weinstein JN</mimVis:author>
      <mimVis:author>Pommier Y</mimVis:author>
      <mimVis:year>2006</mimVis:year>
      <mimVis:journal>Mol Biol Cell</mimVis:journal>
    </mimVis:PublicationXRef>
  </mimVis:MimBio>
</mimVis:Diagram>
```
