# Supplementary material for: A formal MIM specification and tools for the common exchange of MIM diagrams: an XML-Based format, an API, and a validation method
Source: Springer Nature journal article supplement (doi:10.1186/1471-2105-12-167), 2011-05-17
Supplement: 12859_2011_4555_MOESM9_ESM.pdf [file 12859_2011_4555_MOESM9_ESM.pdf]

```
<!-- Validate Explicit Complex Glyph Placement -->
```

```
<iso:pattern name="check-ec-placement" id="check-ec-placement">
```

```
<iso:rule context="mimVis:EntityGlyph[@type='ExplicitComplex']">
```

```
<iso:let name="vis-id" value="@visId"/>
```

```
<iso:let name="inter" value="//mimVis:InteractionGlyph[mimVis:anchorRef=$vis-id]"/>
```

```
<iso:assert test="
```

```
$inter[mimVis:Point[@arrowHead='CovalentModification']] or
```

```
$inter[mimVis:Point[@arrowHead='NonCovalentReversibleBinding']] or
```

```
$inter[mimVis:Point[@arrowHead='CovalentIrreversibleBinding']] or
```

```
$inter[mimVis:Point[@arrowHead='StateCombination']]
```

```
"
```

```
diagnostics="vis-id inter-vis-id inter-start-arrowhead inter-end-arrowhead">
```

```
Explicit complexes should only be placed on the following interaction types: covalent modification,  
non-covalent reversible binding, covalent irreversible binding, or state combination.</iso:assert>
```

```
</iso:rule>
```

```
</iso:pattern>
```
